# Supplementary material for: Snail collaborates with EGR-1 and SP-1 to directly activate transcription of MMP 9 and ZEB1
Source: PubMed Central journal article supplement (PMC5736704; doi:10.1038/s41598-017-18101-7), 2017-12-19
Supplement: 41598_2017_18101_MOESM1_ESM.pdf [file 41598_2017_18101_MOESM1_ESM.pdf]

EGR/SP1 (+) overlapping region: **agcccccACCCcccg**

Transcription Factor Binding Sites common to at least 100% of the sequences

| Common Match Table (click on headers to sort columns) |                  |         |                         |                             |        |       |     |        |             |           |                                   |
|-------------------------------------------------------|------------------|---------|-------------------------|-----------------------------|--------|-------|-----|--------|-------------|-----------|-----------------------------------|
| #                                                     | Seq. name        | Gene Id | Symbol                  | Family                      | Matrix | Start | End | Strand | Matrix sim. | Core sim. | Sequence                          |
| 1                                                     | TempSeq_H2ScGWr5 |         | <a href="#">V\$EGRE</a> | <a href="#">V\$NGFIC.01</a> |        | 1     | 19  | -      | 0.814       | 0.755     | <a href="#">cgggGGGTggggggcct</a> |

| Common Match Table (click on headers to sort columns) |                  |         |                         |                           |        |       |     |        |             |           |                                    |
|-------------------------------------------------------|------------------|---------|-------------------------|---------------------------|--------|-------|-----|--------|-------------|-----------|------------------------------------|
| #                                                     | Seq. name        | Gene Id | Symbol                  | Family                    | Matrix | Start | End | Strand | Matrix sim. | Core sim. | Sequence                           |
| 9                                                     | TempSeq_H2ScGWr5 |         | <a href="#">V\$SP1F</a> | <a href="#">V\$SP1.01</a> |        | 4     | 20  | -      | 0.896       | 0.772     | <a href="#">acgggGGGTggggggcct</a> |

**(B) Homo sapiens zinc finger E-box binding homeobox 1 (ZEB1), RefSeqGene on chromosome 10**  
**NCBI Reference Sequence: NG\_017048.1**

-1132

TTGTGGTTATCTGTATGGTCTTTTCAGAAATCCCAAACCTGTACCAAGTCAAGGATAAAATAAGATAAAA#TCAG  
 CAATCTATCAGGTTTCAGAGATCACAATCTGTTCAGCCGATGCTTCTTGCCTTAAGGTCCTGCACGGCGATGACCGCTCATT  
 GGAAGGAATTCATGGCCTGTGGATACCTTAGCTCTGAGTCCTGCCACCTAGGATCCCACGGTTCTACGCGAG\*GAAGAGGGCG  
 GGGAGCGCGGACC\*GGGTGTGGGAGGCCGAGGTGACAGCAGGTGAGGGCCGGGTGCGGATGGGGAAGTGAGACAAGCACC  
 GTGTGGGTATTACTCATTCCGCTCTACTAAGGAGGCTGCTGGCAAGCGGAACTTCTAGCCTCTCTTTCAATCCAGCTGAAGTTC  
 AATCTCATTGAAGTCACTTCCCATCCCGGTTTCGCTTGGGGGAAACCAGGCGTCCCTGGAAGGGAAGGGAAGGGAGTCCGGG  
 CTGCGCGGGTCAGGTAGCCTCTCTCCGGTCGCCGCTGTCCTCGCCGTCGCCAAACCTGCCCTCCCCTCATCAAGGGAATC  
 CCCGGGGAGTCCAGACCGCGATCCCTTTCCTTGGCCCCGGGGTGGGGGGGGCGGACACGCGAGGGCGTGGGACTGATGGTAGC  
 CCTGCCTCCAGGAAGCAGGCAGGCGGGGACCTCTGGGCGCTCGGAGGGGCAGCTCCGAGGGCACAGGGTACAGGGAGAATC  
 AGCCAGATCCCTCCCTGCCCGGGCAGCCGCGGCGGGTGTGGCCAGCGCGGAGGCAGGACGCCGCCGAGCCTCCAACCTTAC  
 CTTTCCAACCTCCGACAGCCCCTGCGCTTTCTGACCGCTCCCTACGTTTTCCCGCATCCGCTCCCTCTCCCCACCACACCTG  
 AGGAAAACCTTTTCCCTCGCCCCTCAATTCAAATTCAGCAGTGCCACGGTTGCCGCAAACCGCCCGGTCCCTAGCAACAAGGT  
 TCCGGCCGTAGAGCGAGAGCCTCTAGGTGTAAGGAAGGTGATGTCGTAAGCCGGGAGTGTGTAAGCCAGGTGCGGTGGGG  
 AGGGGGGAGGGGTGGAGGCGGAGGGGTGGGGGGGAAGGGGGAGGGAGGGGGAGGGGTGACTCGAGCATTAGACACAAG  
 CGAGAGGATCATGCGGGATGGCCCCAGGTGTAAGCGCAGAAAGCAGGCGAACCCGCGGCGCAATAACGGTGAGTGGCGGAG  
 GGGACCGGGGAGCGGCGGAGTCAGGGGGAGCTGGGCAGCCGGGGCGCCCCGGGGGTGAGGGGGGCGAGCCGGGCTGGGG  
 GCAGCCGGGGCAGGGACGGCAAAGTGGAGTGGGAAAGTAGAA

#: TPA-responsive element (-1061~-830) is marked with [grey box]

\* Searching results of EGR1 and SP1 binding regions downstream of TCACA by Genomatix software

EGR-1 (+) 5' gggtgTGGGaggccgaggt 3'

Sp1(+): 5' gaagaGGGCggggagcg 3'

**EGR**

Common Match Table (click on headers to sort columns)

| #  | Seq. name        | Gene Id | Symbol | Family   | Matrix | Start | End | Strand | Matrix sim. | Core sim. | Sequence          |
|----|------------------|---------|--------|----------|--------|-------|-----|--------|-------------|-----------|-------------------|
| 43 | TempSeq_8mUOFsy9 |         | VSEGRF | VSWT1.01 |        | 152   | 170 | +      | 0.922       | 1.000     | gggigTGGGaggccgag |

**SP1**

Common Match Table (click on headers to sort columns)

| #  | Seq. name        | Gene Id | Symbol | Family   | Matrix | Start | End | Strand | Matrix sim. | Core sim. | Sequence          |
|----|------------------|---------|--------|----------|--------|-------|-----|--------|-------------|-----------|-------------------|
| 27 | TempSeq_8mUOFsy9 |         | VSSP1F | VSSP1.03 |        | 129   | 145 | +      | 0.958       | 1.000     | gaagaGGGCggggagcg |

(C) **Homo sapiens fibronectin 1 (FN1), RefSeqGene on chromosome 2**

>gi|238018066|ref|NG\_012196.1| **Homo sapiens fibronectin 1 (FN1), RefSeqGene on chromosome 2**  
**-683**

CTCAAACACTACCACCACCCCAATAAAAAAGAAAAGGGGAAGGGGGAGCGTCTTGCAACCCCTTCGCTTCACACAAGTCC  
 AGCCACTCCCTTTCTCCAGCCGCTTCCCATCCCTTCCCCATCCCTTAAAAAGTTTGATGACCGCAAAGGAAACCGAAAA  
 AAAGTTGTCTTGCCCCAGTCTGGCGGGCCATCAGCATCTCTTTTGTTCGCTGCGAACCCACAGTCCCCCGTGACGTCACCC  
 GGAGCCCCGGGCCAATCGGCGCGCGGTTCGGCTGCGGCGG\*CGGCGGGCGGGCGGGCGGGTGGGGTGGGGCGGGGCGGGG  
 ACAGCCCCGGCGGGTCTCTCTCCCCGCGCCCCGGGCCTCCAGAGGGGCGGGAGGGGACCGTCCCATATAAGCCCCGGCTC  
 CCGGCGCTCGGACGCCCGCGCCGGCTGTGCTGCACAGGGGGAGGAGAGGGAACCCAGGCGCGAGCGGGAAGAGGGGAC  
 CTGCAGCCACAACCTCTCTGGTCCTCTGCATCCCTTCTGTCCCTCCACCCGTCCCCTTCCCCACCCTCTGGCCCCACCTTCT  
 TGGAGGCGACAACCCCGGGAGGCATTAGAAGGGATTTTTCCCGCAGGTTGCGAAGGGAAGCAAACCTGGTGGCAACTTG  
 CCTCCCGGTGCGGGCGTCTCTCCCCACCGTCTCAACATGCTTAGGGGTCCGGGGCCCCGGGCTGCTGCTGCTGGCCGTCCA  
 GTGCCTGGGGACAGCGGTGCCCTCCACGGGAGCCTCGAAGAGCAAGAGGCAGGCTCAGCAAATGGTTCAGCCCCAGTCCC  
 CGGTGGCTGTGAGTCAAAGCAAGCGTGAGTACTGACCGCGGGCTGAAACAGGCTGCCTCAGGGATGGGACCCTAAAGCCG  
 ACCAAAGTTGGGGCTGAAGTTTTGTGCGCGCGCTGTGTGCGAGTGTGTGCGCGCTTACTGAGAGAAACCAGCTGTGCAC  
 AAAAAAGACCGAGTTTTGAGCACGCTGTTTCTGAGGGCCTGGGATGATAAGACCGTGCATTGGAGGACGAGGACTCTGCG  
 ACTTTCCCGTGTCTAATAAATCTGCACGTTTCAAGATTGCTCTTCTAGGAATTAACCAAACTTGCCTTTAAAGAGAAAAATG  
 ATGCATGTCTATAAATTTCCGTCTGGGATTAGTGTGGTCTTACTGCTACTTATTTCTTCTGTAAATAATTGGTCAAATATT  
 TCAACATGGGGGTGAAAGGGGGTATTGAAATAGCTGTCTTGTCTTAACTAACTTGAAGAGATGTAATTGGTTCAGACCT  
 CTTTAGGGCCGCTCAGGATACTTACCAAGAACAGAGGTTGGAATTTCTTCCGTTTTTCAAAGACACACCCTCCTTTTGCTTT  
 GAGAAAGCTGCTTAAAGTTGCTTTTTGACTATTACTCCAAAAGAATATTTAAGTTCCTTGCATGTTTTAAAAATGTGACTTC  
 AATTGTCTGCCTTCCAAAATGTTTCCAACCTTTTTATGTAGACCCCTGGCCAGATGGAATGACATCATTGTATATAACTTTTA  
 GCAAAGTTAAAAGGAAAAAATATGTACGTCAATATTCACATGAAGAAAATTCCATAATTTGGGAAAAGGAGAAAATGCAAA  
 TGTAACGTTTTCTTCAATTATTTGCAGCCGGTGTATGACAATGGAAAACACTATCAGATAAATCAACAGTGGGAGCGGAC  
 CTACCTA

\* Searching results of EGR1 and SP1 binding regions downstream of TCACA by Genomatix software

EGR-1 (-): 5' **cggcgggCGGCGggcggg** 3'

Sp1 (+): 5' **ccggcGGGCgggcgggc** 3'

EGR/SP1 overlapping region in FN1: **cggcGGGCgggcgggc**

**EGR1**

| Common Match Table (click on headers to sort columns) |                  |         |        |           |        |       |     |        |             |           |                           |
|-------------------------------------------------------|------------------|---------|--------|-----------|--------|-------|-----|--------|-------------|-----------|---------------------------|
| #                                                     | Seq. name        | Gene Id | Symbol | Family    | Matrix | Start | End | Strand | Matrix sim. | Core sim. | Sequence                  |
| 140                                                   | TempSeq_DKm4zj4E |         | VSEGRF | VSEGR2.02 |        | 259   | 277 | -      | 0.943       | 0.850     | gcgGGGgaggagaccg          |
| 77                                                    | TempSeq_DKm4zj4E |         | VSEGRF | VSEGR1.04 |        | 211   | 229 | +      | 0.888       | 1.000     | <b>cggcgggCGGCGggcggg</b> |

**SP1**

| Common Match Table (click on headers to sort columns) |                  |         |        |         |           |       |     |        |             |           |                   |
|-------------------------------------------------------|------------------|---------|--------|---------|-----------|-------|-----|--------|-------------|-----------|-------------------|
| #                                                     | Seq. name        | Gene Id | Symbol | Family  | Matrix    | Start | End | Strand | Matrix sim. | Core sim. | Sequence          |
| 160                                                   | TempSeq_DKm4zj4E |         |        | V\$SP1F | V\$SP1.01 | 290   | 306 | +      | 0.963       | 1.000     | cagagGGCGgggagggg |
| 76                                                    | TempSeq_DKm4zj4E |         |        | V\$SP1F | V\$SP1.03 | 210   | 226 | +      | 0.936       | 1.000     | ccggcGGGCggggcggt |

**(D) Homo sapiens lymphoid enhancer-binding factor 1 (LEF1), RefSeqGene on chromosome 4**

**-789**

TATAAGCAGCGCCCGGTCCTTCCTTCTCTCGCCAAGTTGCCTGATCCTCCCTCCAGGCGCGCGGCACACACCACAC**TCA**  
**CA**CACCCCCAAAACCAAGACTCGTCCTACAGGATCTGGGAAAAGAAAAAGAAAAAAGCCCTCAATCACCACCTCCTTCT  
 \***CGCCGACTCCCCTCACCCCGCCT**CCCCTCCAGCGGGCAGCCAAGGAGAGCTAGAGGCGGGGAGGGGAGAGGGAG  
 GAGAAGCGACGCAAGTGGGTAGCTTTTCAGCGCCGGCGAGGCGCGGGAGGAGGAGAAGCAGTGGGGAGGCGCAGCCGC  
 TCACCTGCGGGGAGGGCGCGGAGGAGGGACCCGGGCTGCGCGCTCTCGGGCCGAGGAACCAGGACGCGCCCGGAGCCT  
 CGCACGCGGCCAAGCTCGGGGCGTCCCCTCCCCTCGGCCGGGCGAACTCAAGGGGCGCAGCTCTTTGCTTTGACAGAGCT  
 GGCCGGCGGAGGCGTGCAGAGCGGCGAGCCGGCGAGCCAGGCTGAGAACTCGAGCCGGGAACAAAGAGGGGTTCGGAC  
 TGAGTGTGTGTGTGTCGGCTCGAGCTCCGGGCAGAGGCATTGGGCCCGAGGCCCCCGCTGTGACTCCCCGAGACTCCGCAG  
 TGCCCTCCACTGCGGAGTCCCCGCGCTTGCCGGCAAAAACCTTTATCTTTGGCAAACCTCTCTTTCTCTTCCCCTCCTCCTCG  
 GCCCCATCTTCTGCTCCTCCTCCTTCTCTAGCAGATTA**ATG**AGCCTCGAGAAGAAAAACCGAAGCGAAAGGGAAGAAA  
 ATAAGAAGATCTAAAACGACATCTCCAGCGTGGGTGGCTCCTTTTTCTTTTTCTTTTTTCCCACCCTTCAGGAAGTGGAC  
 GTTTCGTTATCTTCTGATCCTTGACCTTCTTTTGGGGCAAACGGGGCCCTTCTGCCAGATCCCCTCTCTTTTCTCGGAAAA  
 CAAACTACTAAGTCGGCATCCGGGGTAACTACAGTGGAGAGGGTTTCGCGGAGACGCGCCCGCGGACCCTCCTCTGCAC  
 TTTGGGGAGGCGTGCTCCCTCCAGAACCGGCGTTCTCCGCGCGCAAATCCCGGCGACGCGGGGTGCGGGGGTGGCCGCCG  
 GGGCAGCCTCGTCTAGCGCGCGCCGCGCAGACGCCCCCGGAGTCGCCAGCTACCGCAGCCCTCGCCGCCAGTGCCCTTC  
 GGCTCGGGGGCGGGCGCCTGCGTGGTCTCCGCGAAGCGGGAAAGCGCGGCGCCGCCGGGATTCGGGCGCCGCGGCA  
 GCTGCTCCGGCTGCCGGCCGGCGGCCCGCGCTCGCCCGCCCCGCTTCCGCCCGCTGTCCTGCTGCACGAACCCCTCCAAC  
 TCTCCTTTCCTCCCCACCCTTGAGTTACCCCTCTGTCTTTCCTGCTGTTGCGCGGGTGCTCCACAGCGGAGCGGAGATTA  
 CAGAGCCCGCCGGGATG

\* Searching results of EGR1 and SP1 binding regions downstream of TCACA by Genomatix software

EGR-1 (-): 5' **gggtgAGGGggagtcggcg** 3'

Sp1 (-): 5' **aggcGGGGggtgagggg** 3'

EGR/SP1 overlapping region in LEF1: **CCCCTCACCC**

**EGR1**

| Common Match Table (click on headers to sort columns) |                  |         |        |         |           |       |     |        |             |           |                     |
|-------------------------------------------------------|------------------|---------|--------|---------|-----------|-------|-----|--------|-------------|-----------|---------------------|
| #                                                     | Seq. name        | Gene Id | Symbol | Family  | Matrix    | Start | End | Strand | Matrix sim. | Core sim. | Sequence            |
| 20                                                    | TempSeq_imNCTbvt |         |        | V\$EGRE | V\$WT1.01 | 79    | 97  | -      | 0.928       | 0.837     | gggtgAGGGggagtcggcg |

**SP1**

Transcription Factor Binding Sites common to at least 100% of the sequences

| Common Match Table (click on headers to sort columns) |                  |         |         |            |        |       |     |        |             |           |                |
|-------------------------------------------------------|------------------|---------|---------|------------|--------|-------|-----|--------|-------------|-----------|----------------|
| #                                                     | Seq. name        | Gene Id | Symbol  | Family     | Matrix | Start | End | Strand | Matrix sim. | Core sim. | Sequence       |
| 28                                                    | TempSeq_lmNCTpwt |         | V\$SP1F | V\$TFEG.01 |        | 88    | 104 | -      | 0.849       | 1.000     | agcGGGggtgaggg |

The distal promoter regions of MMP9 (A), ZEB1 (B), fibronectin (C) and lymphoid enhancer-binding factor 1 (LEF1) (D) upstream of translational initiation codon (marked as **ATG**) contained similar sequence architecture including **TCACA** (marked with yellow) and downstream EGR1 and SP1 binding region (marked with light blue and red). The EGR1 and SP1 overlapping region in promoters of MMP9 (A), fibronectin (C) and LEF1 (D) are marked with green. There are two separated region (by 6 bp) of alternative EGR1 and SP1 binding site on ZEB1 promoter. The binding sequences for EGR1 and SP1 for each promoter are demonstrated in the table quoted from the searching results obtained by Genomatix software. TPA-responsive elements in MMP9 and ZEB1 promoters, located at (-832 ~ -771 bp) and (-1061 ~ -830), respectively, are marked with

**Supplemental Fig. 2 MAP for ChIP fragment of MMP9 / ZEB1 promoter and EMSA probe for MMP9 promoter**

(A)

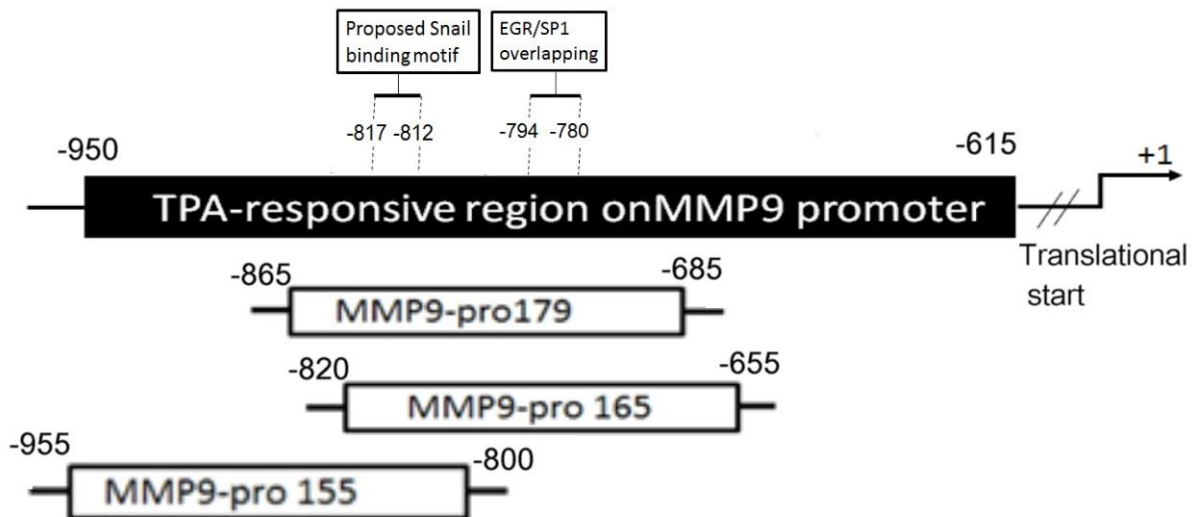

(B)

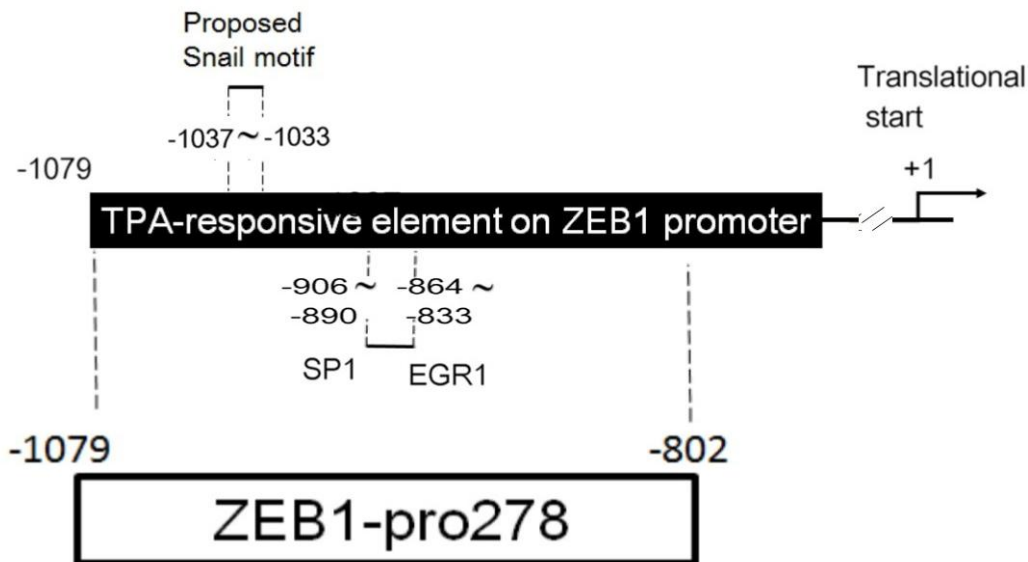

(C)

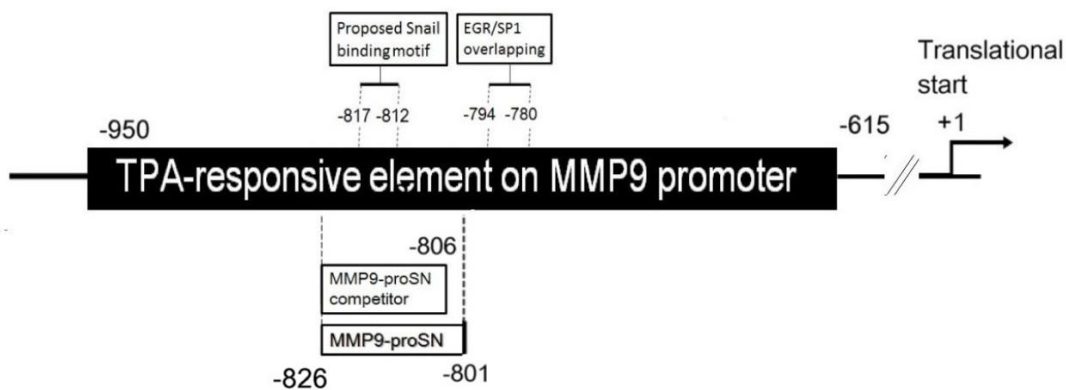

Schematic MAP showing the PCR fragment amplified for the ChIP assay of Snail, EGR and SP1 on MMP9 (A) and ZEB1 (B) promoters and EMSA probe (C) for MMP9 promoter. The black bars represent the distal promoter region of MMP9 (A,C) and ZEB1 (B) from -950 bp and -1079 bp, respectively, upstream of the translation start site. In (A), the sequence of MMP9-pro179 and MMP9-pro165 are located between -865 to -685 bp and -820 to -655 bp, respectively containing both the proposed Snail target region and EGR/SP1 overlapping binding site, whereas MMP9-pro 155 is located between -955 to -800 bp containing the proposed Snail target region only. In (B), the sequence of ZEB1 pro278 are located between -1079 bp to -802 containing both the proposed Snail target region and EGR/SP1 overlapping binding site. In (C), the EMSA probe of MMP9, MMP9-proSN, containing the sequence



from -817 to -794 bp spanning the region of proposed Snail motif but not EGR/SP1 binding site.

**Supplemental Fig. 3 (S3 Fig)** Deletion or mutation of the proposed Snail binding motif decreased TPA-induced promoter activation of MMP9 and in a similar extent

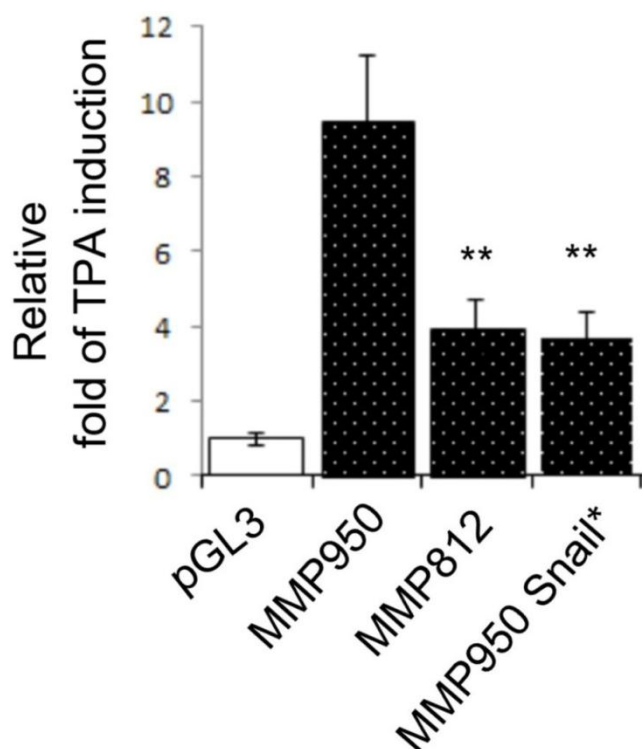

HepG2 cells were transfected with pGL3 vector, the indicated MMP9 promoter plasmids including full length promoter MMP9-950, MMP9-812 with deletion of Snail binding motif, or mutant promoter MMP9-950 Snail\* with alteration on the putative binding region of Snail transcriptional factors, for 24 h. Subsequently, the cells were untreated or treated with 50 nM TPA for 24h and then single luciferase assay were performed. The relative fold of TPA induction for each promoter were quantitated as the activity of TPA treated *vs* untreated, taking the data of pGL3 as 1.0. (\*\*) represent the statistical significant difference ( $p < 0.05$ ,  $N=3$ ) of fold of TPA induction between each of the indicated promoters and the full length promoter (MMP9-950) .

**Supplemental Fig. 4 (S4 Fig)** Actinomycin D affected TPA-induced EGR and Snail expression



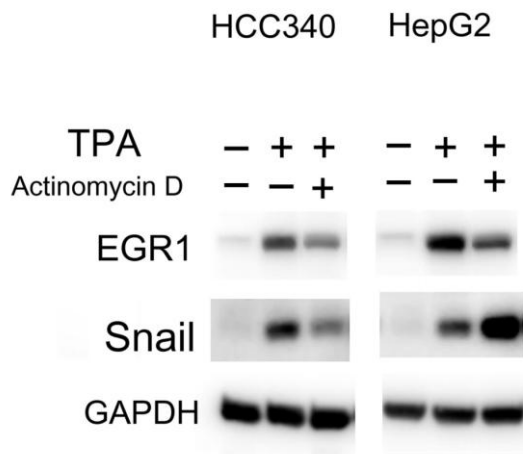

HepG2 and HCC340 cells were untreated, treated with TPA (50 nM) alone or TPA coupled with actinomycin D (20 nM) for 4 h. Western blot of indicated molecules were performed, using GAPDH as a internal control. The data is representative of two reproducible experiments.

**Supplemental Fig. 5 (S5 Fig) TPA-induced mRNA expression of fibronectin and lymphoid enhancer-binding factor (LEF)**

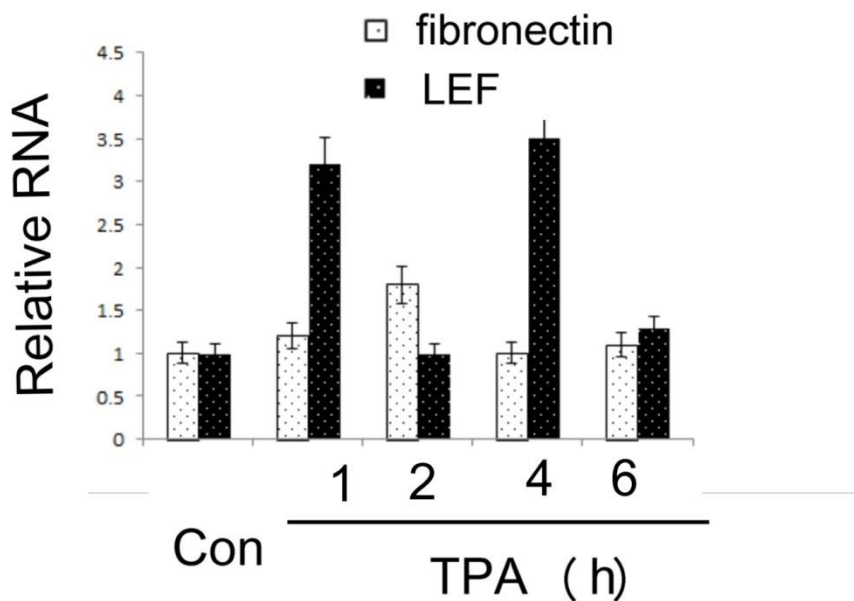

HepG2 cells were treated with 50 nM TPA for the time indicated. Quantitative RT-PCR of fibronectin and LEF were performed. The data shown are average of two reproducible experiment with C.V. 12%

**Supplemental Fig. 6 (S6 Fig)** TPA induced slight association of SP1 with Snail

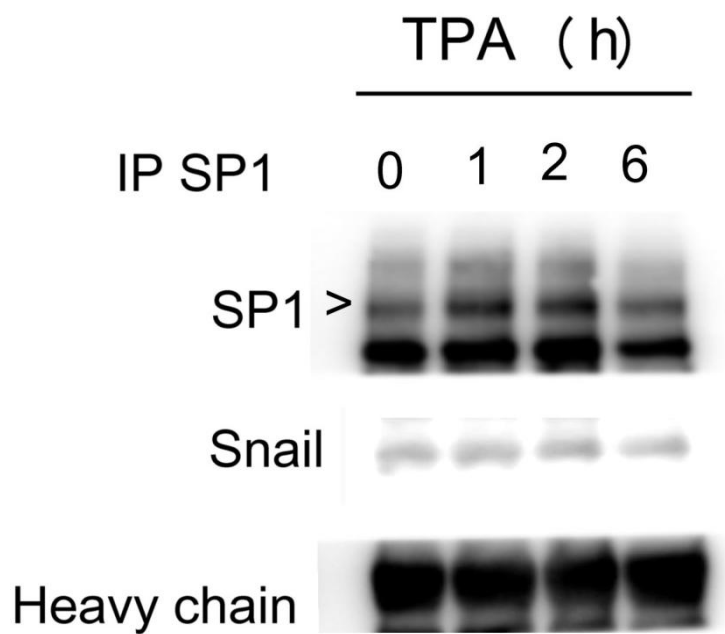

HepG2 cells were treated with TPA (50 nM) for indicated time. Immunoprecipitation (IP) of SP1 followed by Western blot of SP1 and Snail were performed, using heavy chain of Ab as an internal control. The data is representative of two reproducible experiments.
